# Supplementary material for: CSPG4-Specific CAR T Cells for High-Risk Childhood B Cell Precursor Leukemia
Source: PubMed Central journal article supplement (PMC6600602; doi:10.3390/ijms20112764), 2019-06-05
Supplement: ijms-20-02764-s001.pdf [file ijms-20-02764-s001.pdf]

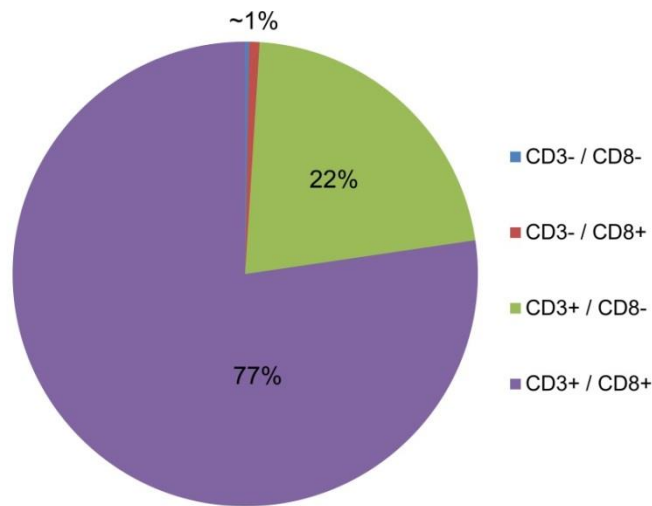

**Supplemental figure S1: Cellular composition after T-cell expansion.**

Healthy donor-derived bulk T cells were expanded using OKT3 and IL-2 as described in the Materials & Methods section. After 10 days, cellular composition was analyzed using double-staining for CD3 and CD8. Data are presented as means of 3 independent experiments.

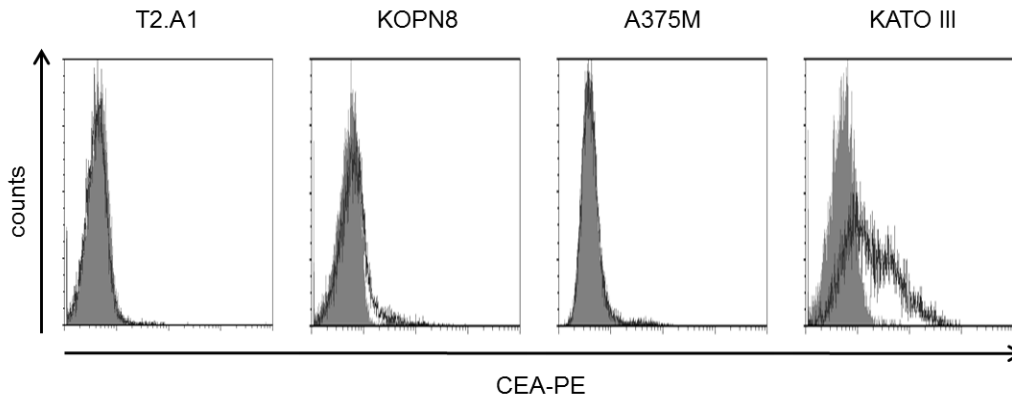

**Supplemental figure S2: CEA expression on tumor cell lines.**

Surface expression of CEA on T2.A1 cells, KOPN8 cells, and A375M cells in comparison to the CSPG4-positive Kato III cell line. One representative staining out of four independent experiments is presented.

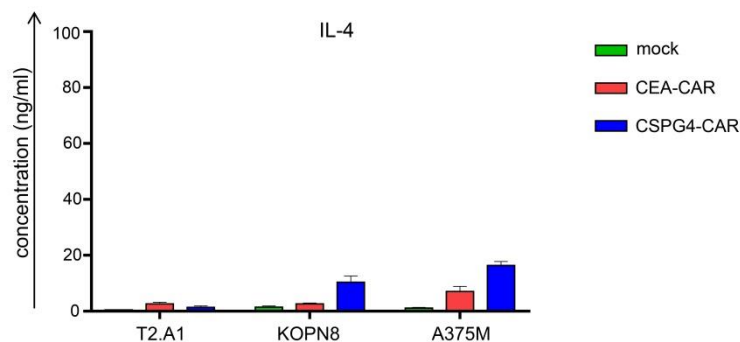

**Supplemental figure S3: CSPG4-CAR T cells produce negligible quantities of IL-4.**

The different T-cell conditions were generated as mentioned above (Fig. 2). Mock (no RNA) electroporated T cells and CEA-CAR T cells served as controls. Twenty-four hours after electroporation, T cells were co-incubated overnight at a 1:1 ratio with T2.A1 cells, KOPN8 cells, and A375M cells. Induced cytokine secretion was quantified in the supernatant with a cytometric bead array (CBA). Concentration of IL-4 is shown [pg/ml]. Data represent means  $\pm$  SEM from 3 independent experiments.

Original data used for Figure S1

| Percentage positive cells |           |           |           | Donor |
|---------------------------|-----------|-----------|-----------|-------|
| CD3-/CD8-                 | CD3-/CD8+ | CD3+/CD8- | CD3+/CD8+ |       |
| 0.23                      | 0.58      | 32.35     | 66.84     | HD 1  |
| 0.17                      | 0.45      | 21.03     | 78.35     | HD 2  |
| 0.39                      | 1.16      | 11.68     | 86.77     | HD 3  |

Original data used for Figure 2c+d

| HD 1       |      |         |           |
|------------|------|---------|-----------|
| CD69 (MFI) |      |         |           |
|            | Mock | CEA-CAR | CSPG4-CAR |
| T2.A1      | 2.11 | 8.83    | 11.82     |
| KOPN8      | 0.28 | 4.14    | 21.84     |
| A375M      | 0.05 | 10.37   | 22.41     |
| CD25 (MFI) |      |         |           |
|            | Mock | CEA-CAR | CSPG4-CAR |
| T2.A1      | 0    | 2.21    | 17.76     |
| KOPN8      | 0    | 6.66    | 33.67     |
| A375M      | 1.17 | 43.45   | 62.63     |
| HD 2       |      |         |           |
| CD69 (MFI) |      |         |           |
|            | Mock | CEA-CAR | CSPG4-CAR |
| T2.A1      | 3.32 | 7.37    | 7.04      |
| KOPN8      | 1.01 | 2.54    | 16.28     |
| A375M      | 1.9  | 10.83   | 21.28     |
| CD25 (MFI) |      |         |           |
|            | Mock | CEA-CAR | CSPG4-CAR |
| T2.A1      | 2.71 | 5.36    | 4.76      |
| KOPN8      | 1.22 | 4.91    | 17.51     |
| A375M      | 4.96 | 19.42   | 50.88     |
| HD 3       |      |         |           |
| CD69 (MFI) |      |         |           |
|            | Mock | CEA-CAR | CSPG4-CAR |
| T2.A1      | 0.99 | 8.87    | 12.37     |
| KOPN8      | 0.1  | 2.51    | 19.87     |
| A375M      | 0    | 10.29   | 21.25     |
| CD25 (MFI) |      |         |           |
|            | Mock | CEA-CAR | CSPG4-CAR |
| T2.A1      | 7.42 | 14.71   | 23.84     |
| KOPN8      | 3.86 | 6.05    | 51.65     |
| A375M      | 8.54 | 43.44   | 80.79     |

Original data used for Figure 3

| HD 1   |        |              |       |           |
|--------|--------|--------------|-------|-----------|
| IL-2   | TNF    | IFN $\gamma$ |       |           |
| pg/ml  | pg/ml  | pg/ml        |       |           |
| 81.6   | 1.0    | 3.0          | T2.A1 | Mock      |
| 25.8   | 6.5    | 465.8        |       | CEA-CAR   |
| 91.7   | 6.1    | 99.5         |       | CSPG4-CAR |
| 33.4   | 21.5   | 166.9        | KOPN8 | Mock      |
| 13.6   | 29.6   | 1703.1       |       | CEA-CAR   |
| 107.4  | 1690.5 | 9617.2       |       | CSPG4-CAR |
| 36.2   | 2.8    | 92.2         | A375M | Mock      |
| 7.8    | 342.6  | 12909.2      |       | CEA-CAR   |
| 3971.4 | 5252.5 | 18928.63     |       | CSPG4-CAR |
| HD 2   |        |              |       |           |
| IL-2   | TNF    | IFN $\gamma$ |       |           |
| pg/ml  | pg/ml  | pg/ml        |       |           |
| 23.9   | 2.9    | 21.3         | T2.A1 | Mock      |
| 51.6   | 19.9   | 592.4        |       | CEA-CAR   |
| 37.9   | 19.7   | 123.5        |       | CSPG4-CAR |
| 33.4   | 20.6   | 158.3        | KOPN8 | Mock      |
| 13.6   | 89.2   | 1330.7       |       | CEA-CAR   |
| 107.4  | 1984.5 | 8631.0       |       | CSPG4-CAR |
| 36.2   | 5.1    | 63.2         | A375M | Mock      |
| 55.7   | 263.9  | 7530.0       |       | CEA-CAR   |
| 3115.9 | 3746.8 | 16607.7      |       | CSPG4-CAR |
| HD 3   |        |              |       |           |
| IL-2   | TNF    | IFN $\gamma$ |       |           |
| pg/ml  | pg/ml  | pg/ml        |       |           |
| 28.5   | 2.3    | 0.3          | T2.A1 | Mock      |
| 14.2   | 5.2    | 200.9        |       | CEA-CAR   |
| 24.1   | 6.8    | 83.0         |       | CSPG4-CAR |
| 55.9   | 20.8   | 177.4        | KOPN8 | Mock      |
| 14.1   | 45.8   | 581.6        |       | CEA-CAR   |
| 103.8  | 1821.0 | 9038.8       |       | CSPG4-CAR |
| 10.9   | 11.1   | 59.8         | A375M | Mock      |
| 32.6   | 150.4  | 7342.4       |       | CEA-CAR   |
| 4785.6 | 6401.1 | 17481.73     |       | CSPG4-CAR |

Original data used for Figure S2

| HD 1  |  |  |       |           |
|-------|--|--|-------|-----------|
| IL-4  |  |  |       |           |
| pg/ml |  |  |       |           |
| 0.6   |  |  | T2.A1 | Mock      |
| 3.2   |  |  |       | CEA-CAR   |
| 2.2   |  |  |       | CSPG4-CAR |
| 2.1   |  |  | KOPN8 | Mock      |
| 3.0   |  |  |       | CEA-CAR   |
| 9.3   |  |  |       | CSPG4-CAR |
| 1.7   |  |  | A375M | Mock      |
| 10.5  |  |  |       | CEA-CAR   |
| 16.4  |  |  |       | CSPG4-CAR |

| HD 2  |  |  |       |           |
|-------|--|--|-------|-----------|
| IL-4  |  |  |       |           |
| pg/ml |  |  |       |           |
| 0.3   |  |  | T2.A1 | Mock      |
| 3.1   |  |  |       | CEA-CAR   |
| 1.4   |  |  |       | CSPG4-CAR |
| 1.6   |  |  | KOPN8 | Mock      |
| 3.0   |  |  |       | CEA-CAR   |
| 14.7  |  |  |       | CSPG4-CAR |
| 0.7   |  |  | A375M | Mock      |
| 6.1   |  |  |       | CEA-CAR   |
| 18.8  |  |  |       | CSPG4-CAR |

| HD 3  |  |  |       |           |
|-------|--|--|-------|-----------|
| IL-4  |  |  |       |           |
| pg/ml |  |  |       |           |
| 0.5   |  |  | T2.A1 | Mock      |
| 1.6   |  |  |       | CEA-CAR   |
| 0.5   |  |  |       | CSPG4-CAR |
| 0.7   |  |  | KOPN8 | Mock      |
| 1.8   |  |  |       | CEA-CAR   |
| 7.1   |  |  |       | CSPG4-CAR |
| 1.0   |  |  | A375M | Mock      |
| 4.5   |  |  |       | CEA-CAR   |
| 13.8  |  |  |       | CSPG4-CAR |

Original data used for Figure 4a

| HD 1              |      |         |           |
|-------------------|------|---------|-----------|
| degranulation (%) |      |         |           |
|                   | Mock | CEA-CAR | CSPG4-CAR |
| T2.A1             | 1.4  | 4.0     | 15.0      |
| KOPN8             | 1.8  | 3.7     | 21.1      |
| A375M             | 1.4  | 12.7    | 42.4      |
| HD 2              |      |         |           |
| degranulation (%) |      |         |           |
|                   | Mock | CEA-CAR | CSPG4-CAR |
| T2.A1             | 2.0  | 4.6     | 7.3       |
| KOPN8             | 2.2  | 3.9     | 21.7      |
| A375M             | 1.1  | 6.7     | 39.7      |
| HD 3              |      |         |           |
| degranulation (%) |      |         |           |
|                   | Mock | CEA-CAR | CSPG4-CAR |
| T2.A1             | 1.2  | 3.5     | 18.9      |
| KOPN8             | 2.7  | 4.4     | 27.0      |
| A375M             | 1    | 12.3    | 42.2      |

Original data used for Figure 4b+c

| HD 1     |      |      |      |                 |
|----------|------|------|------|-----------------|
| Lysis(%) |      |      |      |                 |
| 60:1     | 20:1 | 6:1  | 2:1  |                 |
| 5.0      | 5.3  | 5.0  | 4.3  | T2.A1 Mock      |
| 11.5     | 12.6 | 8.3  | 7.8  | T2.A1 CEA-CAR   |
| 13.8     | 13.6 | 12.5 | 6.0  | T2.A1 CSPG4-CAR |
| 5.6      | 8.1  | 7.0  | 9.9  | KOPN8 mock      |
| 36.0     | 24.0 | 17.2 | 7.4  | KOPN8 CEA-CAR   |
| 53.3     | 53.3 | 44.8 | 39.2 | KOPN8 CSPG4-CAR |

| HD 2     |      |      |      |                 |
|----------|------|------|------|-----------------|
| Lysis(%) |      |      |      |                 |
| 60:1     | 20:1 | 6:1  | 2:1  |                 |
| 24.3     | 10.3 | 2.9  | 0    | T2.A1 Mock      |
| 18.2     | 7.2  | 3.3  | 0    | T2.A1 CEA-CAR   |
| 21.0     | 8.1  | 3.2  | 3.3  | T2.A1 CSPG4-CAR |
| 18.8     | 10.0 | 11.9 | 6.4  | KOPN8 mock      |
| 40.8     | 23.9 | 11.3 | 9.6  | KOPN8 CEA-CAR   |
| 45.7     | 55.1 | 36.0 | 40.1 | KOPN8 CSPG4-CAR |

| HD 3     |      |     |     |  |
|----------|------|-----|-----|--|
| Lysis(%) |      |     |     |  |
| 60:1     | 20:1 | 6:1 | 2:1 |  |

|      |      |      |      |                 |
|------|------|------|------|-----------------|
| 26.6 | 12.6 | 4.7  | 1.6  | T2.A1 Mock      |
| 18.5 | 10.1 | 4.6  | 2.5  | T2.A1 CEA-CAR   |
| 24.8 | 18.7 | 8.3  | 7.3  | T2.A1 CSPG4-CAR |
| 24.2 | 20.5 | 18.6 | 18.2 | KOPN8 mock      |
| 56.6 | 46.0 | 37.0 | 30.3 | KOPN8 CEA-CAR   |
| 81.7 | 95.3 | 97.3 | 64.2 | KOPN8 CSPG4-CAR |
